# Supplementary material for: Sporobolomyces lactucae sp. nov. (Pucciniomycotina, Microbotryomycetes, Sporidiobolales): An Abundant Component of Romaine Lettuce Phylloplanes
Source: MDPI journal article supplement (doi:10.3390/jof8030302), 2022-03-16
Supplement: s1 [file s1]

*Supplementary Table S3 Lettuce origins of samples from which S. lactucae was isolated based on publicly available data. Lettuce samples were cross-referenced with brand and retailer. Suppliers of identified brands and/or retailers were determined via public search.*

| ISOLATE | RETAILER    | PRODUCER              | REGION            | STATE | NOTES                               |
|---------|-------------|-----------------------|-------------------|-------|-------------------------------------|
| HU 9007 | Walmart     | Church Brothers Farms | Yuma              | AZ    | May - Oct production in Salinas, CA |
| HU 9020 | Fresh Thyme | —                     | —                 | —     | —                                   |
| HU 9031 | Fresh Thyme | —                     | —                 | —     | —                                   |
| HU 9034 | Fresh Thyme | —                     | —                 | —     | —                                   |
| HU 9035 | Fresh Thyme | —                     | —                 | —     | —                                   |
| HU 9036 | Fresh Thyme | —                     | —                 | —     | —                                   |
| HU 9047 | Target      | Church Brothers Farms | Yuma              | AZ    | May - Oct production in Salinas, CA |
| HU 9049 | Target      | Church Brothers Farms | Yuma              | AZ    | May - Oct production in Salinas, CA |
| HU 9062 | Payless     | Josie's               | Soledad           | CA    | Organic                             |
| HU 9065 | Payless     | Josie's               | Soledad           | CA    | Organic                             |
| HU 9074 | Payless     | —                     | —                 | —     | —                                   |
| HU 9076 | Payless     | —                     | —                 | —     | —                                   |
| HU 9091 | Target      | Church Brothers Farms | Yuma              | AZ    | May - Oct production in Salinas, CA |
| HU 9092 | Payless     | —                     | —                 | —     | —                                   |
| HU 9100 | Payless     | —                     | —                 | —     | —                                   |
| HU 9101 | Payless     | —                     | —                 | —     | —                                   |
| HU 9111 | Target      | Church Brothers Farms | Yuma              | AZ    | May - Oct production in Salinas, CA |
| HU 9113 | Payless     | Josie's               | Soledad           | CA    | Organic                             |
| HU 9115 | Payless     | Josie's               | Soledad           | CA    | Organic                             |
| HU 9116 | Payless     | Josie's               | Soledad           | CA    | Organic                             |
| HU 9128 | Payless     | Josie's               | Soledad           | CA    | Organic                             |
| HU 9129 | Payless     | Josie's               | Soledad           | CA    | Organic                             |
| HU 9133 | Payless     | —                     | —                 | —     | —                                   |
| HU 9137 | Payless     | —                     | —                 | —     | —                                   |
| HU 9143 | Payless     | —                     | —                 | —     | —                                   |
| HU 9146 | Payless     | —                     | —                 | —     | —                                   |
| HU 9148 | Payless     | —                     | —                 | —     | —                                   |
| HU 9152 | Meijer      | Ocean Mist            | Coachella/Salinas | CA    | —                                   |
| HU 9155 | Meijer      | Ocean Mist            | Coachella/Salinas | CA    | —                                   |
| HU 9163 | Meijer      | Ocean Mist            | Coachella/Salinas | CA    | —                                   |
| HU 9170 | Meijer      | Ocean Mist            | Coachella/Salinas | CA    | —                                   |
| HU 9175 | Meijer      | Ocean Mist            | Coachella/Salinas | CA    | —                                   |
| HU 9180 | Meijer      | Ocean Mist            | Coachella/Salinas | CA    | —                                   |
| HU 9185 | Meijer      | Ocean Mist            | Coachella/Salinas | CA    | —                                   |
| HU 9186 | Meijer      | Ocean Mist            | Coachella/Salinas | CA    | —                                   |
| HU 9188 | Meijer      | Ocean Mist            | Coachella/Salinas | CA    | —                                   |
| HU 9192 | Meijer      | Ocean Mist            | Coachella/Salinas | CA    | —                                   |
| HU 9197 | Meijer      | Ocean Mist            | Coachella/Salinas | CA    | —                                   |
| HU 9202 | Walmart     | Tanimura and Antle    | Salinas           | CA    | Nov - Mar production in Yuma, AZ    |
| HU 9203 | Walmart     | Tanimura and Antle    | Salinas           | CA    | Nov - Mar production in Yuma, AZ    |

|                |         |                    |         |    |                                  |
|----------------|---------|--------------------|---------|----|----------------------------------|
| <b>HU 9204</b> | Walmart | Tanimura and Antle | Salinas | CA | Nov - Mar production in Yuma, AZ |
| <b>HU 9206</b> | Walmart | Tanimura and Antle | Salinas | CA | Nov - Mar production in Yuma, AZ |
| <b>HU 9208</b> | Walmart | Tanimura and Antle | Salinas | CA | Nov - Mar production in Yuma, AZ |
| <b>HU 9213</b> | Walmart | Tanimura and Antle | Salinas | CA | Nov - Mar production in Yuma, AZ |
| <b>HU 9214</b> | Walmart | Tanimura and Antle | Salinas | CA | Nov - Mar production in Yuma, AZ |
| <b>HU 9216</b> | Walmart | Tanimura and Antle | Salinas | CA | Nov - Mar production in Yuma, AZ |
| <b>HU 9233</b> | Walmart | Tanimura and Antle | Salinas | CA | Nov - Mar production in Yuma, AZ |
| <b>HU 9235</b> | Walmart | Tanimura and Antle | Salinas | CA | Nov - Mar production in Yuma, AZ |
| <b>HU 9241</b> | Walmart | —                  | —       | —  | —                                |
| <b>HU 9243</b> | Walmart | —                  | —       | —  | —                                |
| <b>HU 9244</b> | Walmart | Tanimura and Antle | Salinas | CA | Nov - Mar production in Yuma, AZ |
| <b>HU 9246</b> | Walmart | Tanimura and Antle | Salinas | CA | Nov - Mar production in Yuma, AZ |
| <b>HU 9249</b> | Walmart | Tanimura and Antle | Salinas | CA | Nov - Mar production in Yuma, AZ |
| <b>HU 9250</b> | Walmart | Tanimura and Antle | Salinas | CA | Nov - Mar production in Yuma, AZ |
| <b>HU 9251</b> | Walmart | Tanimura and Antle | Salinas | CA | Nov - Mar production in Yuma, AZ |
| <b>HU 9255</b> | Walmart | —                  | —       | —  | —                                |
| <b>HU 9257</b> | Walmart | —                  | —       | —  | —                                |
| <b>HU 9266</b> | Walmart | —                  | —       | —  | —                                |
| <b>HU 9268</b> | Walmart | —                  | —       | —  | —                                |
| <b>HU 9272</b> | Walmart | —                  | —       | —  | —                                |
| <b>HU 9273</b> | Walmart | —                  | —       | —  | —                                |
| <b>HU 9279</b> | Walmart | Tanimura and Antle | Salinas | CA | Nov - Mar production in Yuma, AZ |
| <b>HU 9281</b> | Walmart | Tanimura and Antle | Salinas | CA | Nov - Mar production in Yuma, AZ |
| <b>HU 9285</b> | Walmart | Tanimura and Antle | Salinas | CA | Nov - Mar production in Yuma, AZ |
| <b>HU 9286</b> | Walmart | Tanimura and Antle | Salinas | CA | Nov - Mar production in Yuma, AZ |
