# Supplementary material for: Sporobolomyces lactucae sp. nov. (Pucciniomycotina, Microbotryomycetes, Sporidiobolales): An Abundant Component of Romaine Lettuce Phylloplanes
Source: MDPI journal article supplement (doi:10.3390/jof8030302), 2022-03-16
Supplement: s1 [file s1]

Supplementary Table S2. Carbon & nitrogen assimilations and high osmotic pressure tests for all *Sporobolomyces* s.s. species included in phylogenetic analysis in this manuscript. Weak = w; delayed = d; variable = v.

[illegible]

[illegible]
