# Supplementary material for: Sporobolomyces lactucae sp. nov. (Pucciniomycotina, Microbotryomycetes, Sporidiobolales): An Abundant Component of Romaine Lettuce Phylloplanes
Source: MDPI journal article supplement (doi:10.3390/jof8030302), 2022-03-16
Supplement: s1 [file s1]

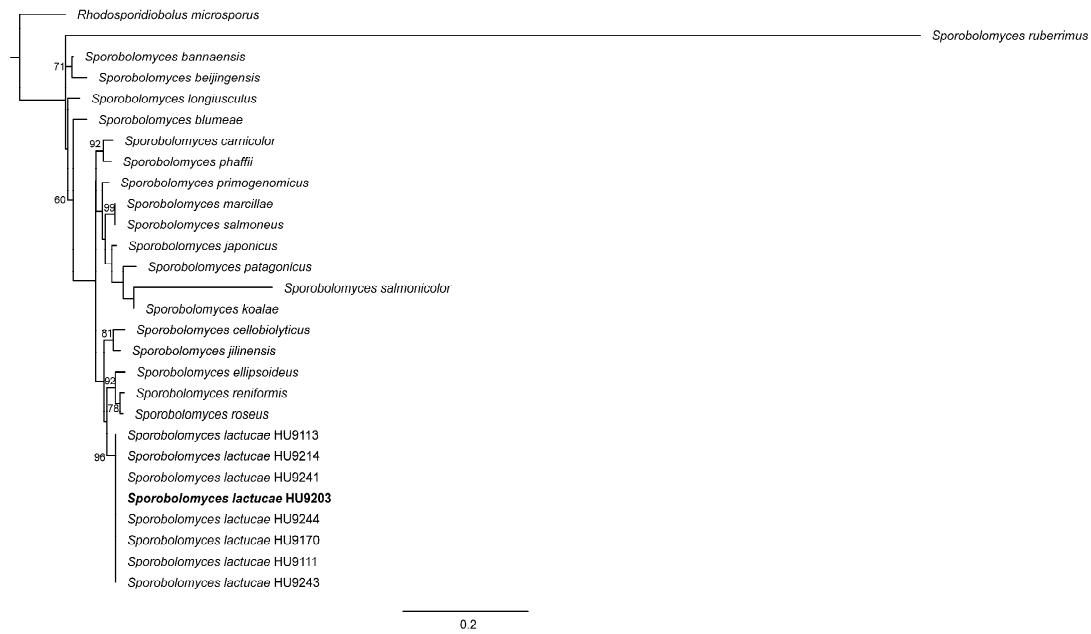

**Supplementary Figure S1.** Maximum likelihood tree of *Sporobolomyces* s.s. species using the cyt-b locus.

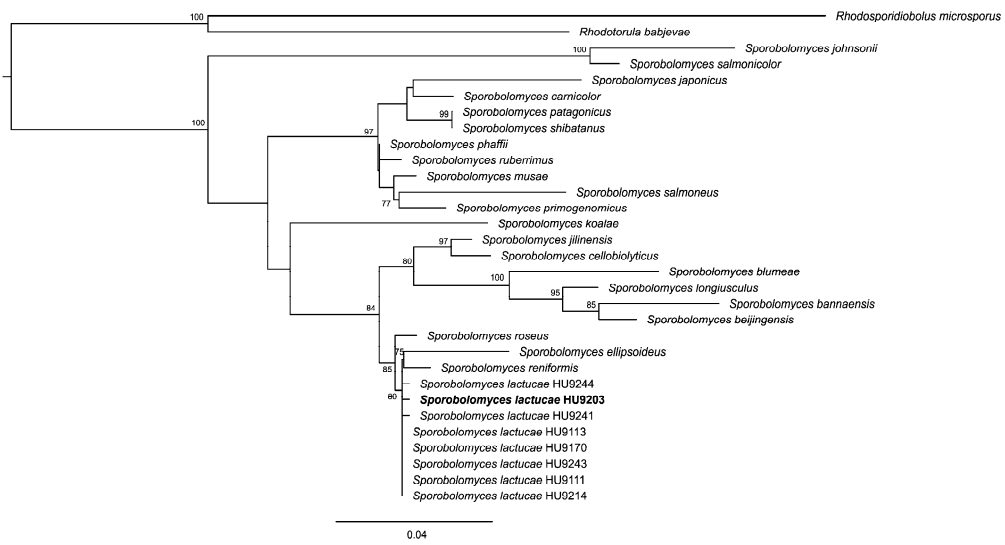

**Supplementary Figure S2.** Maximum likelihood tree of *Sporobolomyces* s.s. species using the ITS locus.

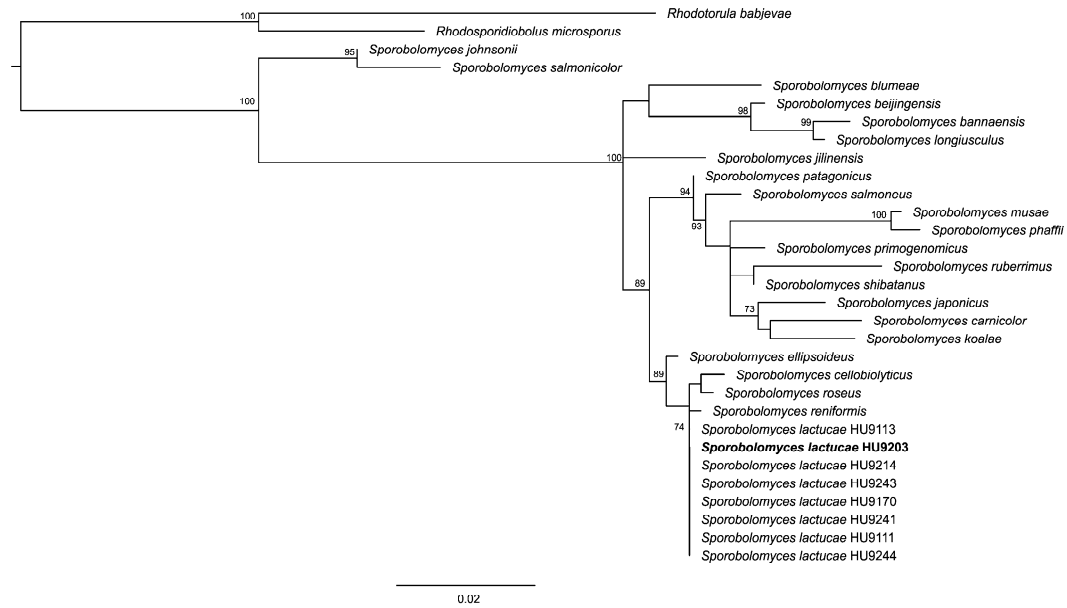

**Supplementary Figure S3.** Maximum likelihood tree of *Sporobolomyces* s.s. species using the LSU D1/D2 locus.

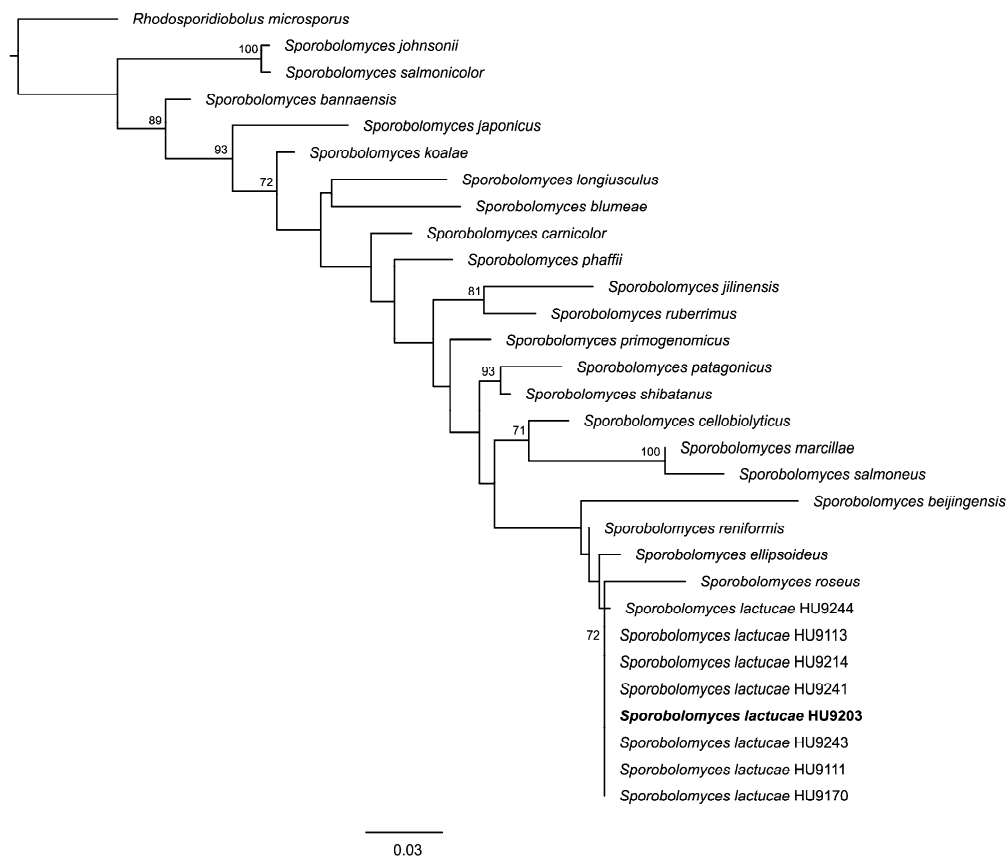

**Supplementary Figure S4.** Maximum likelihood tree of *Sporobolomyces* s.s. species using the *tef-1* locus.
