# Supplementary material for: Sporobolomyces lactucae sp. nov. (Pucciniomycotina, Microbotryomycetes, Sporidiobolales): An Abundant Component of Romaine Lettuce Phylloplanes
Source: MDPI journal article supplement (doi:10.3390/jof8030302), 2022-03-16
Supplement: s1 [file s1]

Supplementary Table S1 Isolates that were examined in the description of the new species *Sporobolomyces lactucae*. All HU strains were isolated via lettuce leaf homogenization and plated. All MCA strains were isolated via spore drop method, noted as SDC (spore drop)

| Isolate | Epithet                        | Isolation | Plant host                           | Substrate  | Locality (State) | Locality (City) | Date Collected | ITS      | LSU | SSU | <i>tef1</i> | <i>cytb</i> |
|---------|--------------------------------|-----------|--------------------------------------|------------|------------------|-----------------|----------------|----------|-----|-----|-------------|-------------|
| HU 9007 | <i>Sporobolomyces lactucae</i> | direct    | Asteraceae;<br><i>Lactuca sativa</i> | total leaf | Indiana          | Lafayette       | 2016 Apr 30    | MG470871 | -   | -   | -           | -           |
| HU 9020 | <i>Sporobolomyces lactucae</i> | direct    | Asteraceae;<br><i>Lactuca sativa</i> | total leaf | Indiana          | Lafayette       | 2016 Apr 30    | MG470872 | -   | -   | -           | -           |
| HU 9031 | <i>Sporobolomyces lactucae</i> | direct    | Asteraceae;<br><i>Lactuca sativa</i> | total leaf | Indiana          | Lafayette       | 2016 Apr 30    | MG470873 | -   | -   | -           | -           |
| HU 9034 | <i>Sporobolomyces lactucae</i> | direct    | Asteraceae;<br><i>Lactuca sativa</i> | total leaf | Indiana          | Lafayette       | 2016 Apr 30    | MG470875 | -   | -   | -           | -           |
| HU 9035 | <i>Sporobolomyces lactucae</i> | direct    | Asteraceae;<br><i>Lactuca sativa</i> | total leaf | Indiana          | Lafayette       | 2016 Apr 30    | MG470876 | -   | -   | -           | -           |
| HU 9036 | <i>Sporobolomyces lactucae</i> | direct    | Asteraceae;<br><i>Lactuca sativa</i> | total leaf | Indiana          | Lafayette       | 2016 Apr 30    | MG470877 | -   | -   | -           | -           |
| HU 9047 | <i>Sporobolomyces lactucae</i> | direct    | Asteraceae;<br><i>Lactuca sativa</i> | total leaf | Indiana          | Lafayette       | 2016 May 02    | MG470878 | -   | -   | -           | -           |
| HU 9049 | <i>Sporobolomyces lactucae</i> | direct    | Asteraceae;<br><i>Lactuca sativa</i> | total leaf | Indiana          | Lafayette       | 2016 May 02    | MG470879 | -   | -   | -           | -           |
| HU 9062 | <i>Sporobolomyces lactucae</i> | direct    | Asteraceae;<br><i>Lactuca sativa</i> | total leaf | Indiana          | Lafayette       | 2016 May 06    | MG470880 | -   | -   | -           | -           |
| HU 9065 | <i>Sporobolomyces lactucae</i> | direct    | Asteraceae;<br><i>Lactuca sativa</i> | total leaf | Indiana          | Lafayette       | 2016 May 06    | MG470881 | -   | -   | -           | -           |
| HU 9074 | <i>Sporobolomyces lactucae</i> | direct    | Asteraceae;<br><i>Lactuca sativa</i> | total leaf | Indiana          | Lafayette       | 2016 May 06    | MG470882 | -   | -   | -           | -           |
| HU 9076 | <i>Sporobolomyces lactucae</i> | direct    | Asteraceae;<br><i>Lactuca sativa</i> | total leaf | Indiana          | Lafayette       | 2016 May 06    | MG470883 | -   | -   | -           | -           |

|         |                            |        |                               |            |         |           |                |          |          |          |          |          |
|---------|----------------------------|--------|-------------------------------|------------|---------|-----------|----------------|----------|----------|----------|----------|----------|
|         | lactucae                   |        |                               |            |         |           |                |          |          |          |          |          |
| HU 9091 | Sporobolomyces<br>lactucae | direct | Asteraceae;<br>Lactuca sativa | total leaf | Indiana | Lafayette | 2016 May<br>02 | MG470884 | -        | -        | -        | -        |
| HU 9092 | Sporobolomyces<br>lactucae | direct | Asteraceae;<br>Lactuca sativa | total leaf | Indiana | Lafayette | 2016 May<br>06 | MG470885 | -        | -        | -        | -        |
| HU 9100 | Sporobolomyces<br>lactucae | direct | Asteraceae;<br>Lactuca sativa | total leaf | Indiana | Lafayette | 2016 May<br>06 | MG470886 | -        | -        | -        | -        |
| HU 9101 | Sporobolomyces<br>lactucae | direct | Asteraceae;<br>Lactuca sativa | total leaf | Indiana | Lafayette | 2016 May<br>06 | MG470887 | -        | -        | -        | -        |
| HU 9111 | Sporobolomyces<br>lactucae | direct | Asteraceae;<br>Lactuca sativa | total leaf | Indiana | Lafayette | 2016 May<br>02 | MG470888 | MG588941 | MG588988 | MG589076 | MG589036 |
| HU 9113 | Sporobolomyces<br>lactucae | direct | Asteraceae;<br>Lactuca sativa | total leaf | Indiana | Lafayette | 2016 May<br>06 | MG470889 | MG588942 | MG588989 | MG589077 | MG589037 |
| HU 9115 | Sporobolomyces<br>lactucae | direct | Asteraceae;<br>Lactuca sativa | total leaf | Indiana | Lafayette | 2016 May<br>06 | MG470890 | -        | -        | -        | -        |
| HU 9116 | Sporobolomyces<br>lactucae | direct | Asteraceae;<br>Lactuca sativa | total leaf | Indiana | Lafayette | 2016 May<br>06 | MG470891 | -        | -        | -        | -        |
| HU 9128 | Sporobolomyces<br>lactucae | direct | Asteraceae;<br>Lactuca sativa | total leaf | Indiana | Lafayette | 2016 May<br>06 | MG470892 | -        | -        | -        | -        |
| HU 9129 | Sporobolomyces<br>lactucae | direct | Asteraceae;<br>Lactuca sativa | total leaf | Indiana | Lafayette | 2016 May<br>06 | MG470893 | -        | -        | -        | -        |
| HU 9133 | Sporobolomyces<br>lactucae | direct | Asteraceae;<br>Lactuca sativa | total leaf | Indiana | Lafayette | 2016 May<br>06 | MG470894 | -        | -        | -        | -        |
| HU 9137 | Sporobolomyces<br>lactucae | direct | Asteraceae;<br>Lactuca sativa | total leaf | Indiana | Lafayette | 2016 May<br>06 | MG470895 | -        | -        | -        | -        |
| HU 9143 | Sporobolomyces<br>lactucae | direct | Asteraceae;<br>Lactuca sativa | total leaf | Indiana | Lafayette | 2016 May<br>06 | MG470897 | -        | -        | -        | -        |

|         |                                |        |                                      |            |          |                |             |          |          |          |          |          |
|---------|--------------------------------|--------|--------------------------------------|------------|----------|----------------|-------------|----------|----------|----------|----------|----------|
| HU 9146 | <i>Sporobolomyces lactucae</i> | direct | Asteraceae;<br><i>Lactuca sativa</i> | total leaf | Indiana  | Lafayette      | 2016 May 06 | MG470898 | MG588943 | MG588990 | MG589078 | MG589038 |
| HU 9148 | <i>Sporobolomyces lactucae</i> | direct | Asteraceae;<br><i>Lactuca sativa</i> | total leaf | Indiana  | Lafayette      | 2016 May 06 | MG470899 | -        | -        | -        | -        |
| HU 9152 | <i>Sporobolomyces lactucae</i> | direct | Asteraceae;<br><i>Lactuca sativa</i> | total leaf | Indiana  | West Lafayette | 2016 May 08 | MG470892 | -        | -        | -        | -        |
| HU 9155 | <i>Sporobolomyces lactucae</i> | direct | Asteraceae;<br><i>Lactuca sativa</i> | total leaf | Indiana  | West Lafayette | 2016 May 08 | MG470901 | -        | -        | -        | -        |
| HU 9163 | <i>Sporobolomyces lactucae</i> | direct | Asteraceae;<br><i>Lactuca sativa</i> | total leaf | Indiana  | West Lafayette | 2016 May 08 | MG470902 | -        | -        | -        | -        |
| HU 9170 | <i>Sporobolomyces lactucae</i> | direct | Asteraceae;<br><i>Lactuca sativa</i> | total leaf | Indiana  | West Lafayette | 2016 May 08 | MG470903 | MG588944 | MG588991 | MG589079 | MG589039 |
| HU 9175 | <i>Sporobolomyces lactucae</i> | direct | Asteraceae;<br><i>Lactuca sativa</i> | total leaf | Indiana  | West Lafayette | 2016 May 08 | MG470904 | MG588945 | MG588992 | MG589080 | -        |
| HU 9180 | <i>Sporobolomyces lactucae</i> | direct | Asteraceae;<br><i>Lactuca sativa</i> | total leaf | Illinois | Champaign      | 2016 May 09 | MG470905 | -        | -        | -        | -        |
| HU 9185 | <i>Sporobolomyces lactucae</i> | direct | Asteraceae;<br><i>Lactuca sativa</i> | total leaf | Illinois | Champaign      | 2016 May 09 | MG470906 | -        | -        | -        | -        |
| HU 9186 | <i>Sporobolomyces lactucae</i> | direct | Asteraceae;<br><i>Lactuca sativa</i> | total leaf | Illinois | Champaign      | 2016 May 09 | MG470907 | -        | -        | -        | -        |
| HU 9188 | <i>Sporobolomyces lactucae</i> | direct | Asteraceae;<br><i>Lactuca sativa</i> | total leaf | Illinois | Champaign      | 2016 May 09 | MG470908 | -        | -        | -        | -        |
| HU 9192 | <i>Sporobolomyces lactucae</i> | direct | Asteraceae;<br><i>Lactuca sativa</i> | total leaf | Illinois | Champaign      | 2016 May 09 | MG470909 | -        | -        | -        | -        |
| HU 9197 | <i>Sporobolomyces lactucae</i> | direct | Asteraceae;<br><i>Lactuca sativa</i> | total leaf | Illinois | Champaign      | 2016 May 09 | MG470910 | -        | -        | -        | -        |

|                |                                       |               |                                              |                   |                 |                  |                    |                 |                 |                 |                 |                 |
|----------------|---------------------------------------|---------------|----------------------------------------------|-------------------|-----------------|------------------|--------------------|-----------------|-----------------|-----------------|-----------------|-----------------|
| HU 9202        | <i>Sporobolomyces lactucae</i>        | direct        | Asteraceae;<br><i>Lactuca sativa</i>         | total leaf        | Illinois        | Champaign        | 2016 May 09        | MG470911        | MG588946        | MG588993        | MG589081        | MG589040        |
| <b>HU 9203</b> | <b><i>Sporobolomyces lactucae</i></b> | <b>direct</b> | <b>Asteraceae;<br/><i>Lactuca sativa</i></b> | <b>total leaf</b> | <b>Illinois</b> | <b>Champaign</b> | <b>2016 May 09</b> | <b>MG470912</b> | <b>MG588947</b> | <b>MG588994</b> | <b>MG589082</b> | <b>MG589041</b> |
| HU 9204        | <i>Sporobolomyces lactucae</i>        | direct        | Asteraceae;<br><i>Lactuca sativa</i>         | total leaf        | Illinois        | Champaign        | 2016 May 09        | MG470913        | MG588948        | MG588995        | MG589083        | MG589042        |
| HU 9206        | <i>Sporobolomyces lactucae</i>        | direct        | Asteraceae;<br><i>Lactuca sativa</i>         | total leaf        | Illinois        | Champaign        | 2016 May 09        | MG470914        | -               | -               | -               | -               |
| HU 9208        | <i>Sporobolomyces lactucae</i>        | direct        | Asteraceae;<br><i>Lactuca sativa</i>         | total leaf        | Illinois        | Champaign        | 2016 May 09        | MG470915        | -               | -               | -               | -               |
| HU 9213        | <i>Sporobolomyces lactucae</i>        | direct        | Asteraceae;<br><i>Lactuca sativa</i>         | total leaf        | Illinois        | Champaign        | 2016 May 09        | MG470916        | -               | -               | -               | -               |
| HU 9214        | <i>Sporobolomyces lactucae</i>        | direct        | Asteraceae;<br><i>Lactuca sativa</i>         | total leaf        | Illinois        | Champaign        | 2016 May 09        | MG470917        | MG588949        | MG588996        | MG589084        | MG589043        |
| HU 9216        | <i>Sporobolomyces lactucae</i>        | direct        | Asteraceae;<br><i>Lactuca sativa</i>         | total leaf        | Illinois        | Champaign        | 2016 May 09        | MG470918        | -               | -               | -               | -               |
| HU 9233        | <i>Sporobolomyces lactucae</i>        | direct        | Asteraceae;<br><i>Lactuca sativa</i>         | total leaf        | Illinois        | Champaign        | 2016 May 09        | -               | -               | -               | -               | -               |
| HU 9235        | <i>Sporobolomyces lactucae</i>        | direct        | Asteraceae;<br><i>Lactuca sativa</i>         | total leaf        | Illinois        | Champaign        | 2016 May 09        | MG470920        | MG588950        | MG588997        | MG589085        | MG589044        |
| HU 9241        | <i>Sporobolomyces lactucae</i>        | direct        | Asteraceae;<br><i>Lactuca sativa</i>         | total leaf        | Illinois        | Chicago          | 2016 May 19        | MG470921        | MG588951        | MG588998        | MG589086        | MG589045        |
| HU 9243        | <i>Sporobolomyces lactucae</i>        | direct        | Asteraceae;<br><i>Lactuca sativa</i>         | total leaf        | Illinois        | Chicago          | 2016 May 19        | MG470922        | MG588952        | MG588999        | MG589087        | MG589046        |
| HU 9244        | <i>Sporobolomyces lactucae</i>        | direct        | Asteraceae;<br><i>Lactuca sativa</i>         | total leaf        | Illinois        | Chicago          | 2016 May 19        | MG470923        | MG588953        | MG589000        | MG589088        | MG589047        |

|         |                                |        |                                      |            |          |         |                |          |   |          |   |   |
|---------|--------------------------------|--------|--------------------------------------|------------|----------|---------|----------------|----------|---|----------|---|---|
| HU 9246 | <i>Sporobolomyces lactucae</i> | direct | Asteraceae;<br><i>Lactuca sativa</i> | total leaf | Illinois | Chicago | 2016 May<br>19 | MG470924 | - | -        | - | - |
| HU 9249 | <i>Sporobolomyces lactucae</i> | direct | Asteraceae;<br><i>Lactuca sativa</i> | total leaf | Illinois | Chicago | 2016 May<br>19 | MG470925 | - | -        | - | - |
| HU 9250 | <i>Sporobolomyces lactucae</i> | direct | Asteraceae;<br><i>Lactuca sativa</i> | total leaf | Illinois | Chicago | 2016 May<br>19 | MG470926 | - | -        | - | - |
| HU 9251 | <i>Sporobolomyces lactucae</i> | direct | Asteraceae;<br><i>Lactuca sativa</i> | total leaf | Illinois | Chicago | 2016 May<br>19 | MG470927 | - | -        | - | - |
| HU 9255 | <i>Sporobolomyces lactucae</i> | direct | Asteraceae;<br><i>Lactuca sativa</i> | total leaf | Illinois | Chicago | 2016 May<br>19 | MG470928 | - | -        | - | - |
| HU 9257 | <i>Sporobolomyces lactucae</i> | direct | Asteraceae;<br><i>Lactuca sativa</i> | total leaf | Illinois | Chicago | 2016 May<br>19 | MG470929 | - | -        | - | - |
| HU 9266 | <i>Sporobolomyces lactucae</i> | direct | Asteraceae;<br><i>Lactuca sativa</i> | total leaf | Illinois | Chicago | 2016 May<br>19 | MG470930 | - | -        | - | - |
| HU 9268 | <i>Sporobolomyces lactucae</i> | direct | Asteraceae;<br><i>Lactuca sativa</i> | total leaf | Illinois | Chicago | 2016 May<br>19 | MG470931 | - | MG589001 | - | - |
| HU 9272 | <i>Sporobolomyces lactucae</i> | direct | Asteraceae;<br><i>Lactuca sativa</i> | total leaf | Illinois | Chicago | 2016 May<br>19 | MG470932 | - | -        | - | - |
| HU 9273 | <i>Sporobolomyces lactucae</i> | direct | Asteraceae;<br><i>Lactuca sativa</i> | total leaf | Illinois | Chicago | 2016 May<br>19 | MG470933 | - | -        | - | - |
| HU 9279 | <i>Sporobolomyces lactucae</i> | direct | Asteraceae;<br><i>Lactuca sativa</i> | total leaf | Illinois | Chicago | 2016 May<br>19 | MG470934 | - | -        | - | - |
| HU 9281 | <i>Sporobolomyces lactucae</i> | direct | Asteraceae;<br><i>Lactuca sativa</i> | total leaf | Illinois | Chicago | 2016 May<br>19 | MG470935 | - | -        | - | - |
| HU 9285 | <i>Sporobolomyces lactucae</i> | direct | Asteraceae;<br><i>Lactuca sativa</i> | total leaf | Illinois | Chicago | 2016 May<br>19 | MG470936 | - | -        | - | - |

|         |                                |        |                                             |                                                                         |            |          |             |          |   |   |          |          |
|---------|--------------------------------|--------|---------------------------------------------|-------------------------------------------------------------------------|------------|----------|-------------|----------|---|---|----------|----------|
| HU 9286 | <i>Sporobolomyces lactucae</i> | direct | Asteraceae;<br><i>Lactuca sativa</i>        | total leaf                                                              | Illinois   | Chicago  | 2016 May 19 | MG470937 | - | - | MG589089 | MG589048 |
| MCA6380 | <i>Sporobolomyces lactucae</i> | SDC    | Rhamnaceae;<br><i>Ceanothus arboreus</i>    | phylloplane - diseased leaf -<br><i>Septoria blasdalei</i><br>MCA 6369  | California | Berkeley | 2016 Aug 05 | MG471074 | - | - | -        | -        |
| MCA6381 | <i>Sporobolomyces lactucae</i> | SDC    | Rhamnaceae;<br><i>Ceanothus arboreus</i>    | phylloplane - diseased leaf -<br><i>Septoria blasdalei</i><br>MCA 6370  | California | Berkeley | 2016 Aug 05 | MG471075 | - | - | -        | -        |
| MCA6382 | <i>Sporobolomyces lactucae</i> | SDC    | Rhamnaceae;<br><i>Ceanothus arboreus</i>    | phylloplane - healthy leaf                                              | California | Berkeley | 2016 Aug 05 | MG471076 | - | - | -        | -        |
| MCA6385 | <i>Sporobolomyces lactucae</i> | SDC    | Plantaginaceae;<br><i>Antirrhinum majus</i> | phylloplane - healthy leaf                                              | California | Berkeley | 2016 Aug 05 | MG471078 | - | - | -        | -        |
| MCA6386 | <i>Sporobolomyces lactucae</i> | SDC    | Plantaginaceae;<br><i>Antirrhinum majus</i> | phylloplane - diseased leaf -<br><i>Puccinia antirrhini</i><br>MCA 6366 | California | Berkeley | 2016 Aug 05 | MG471079 | - | - | -        | -        |
| MCA6387 | <i>Sporobolomyces lactucae</i> | SDC    | Plantaginaceae;<br><i>Antirrhinum majus</i> | phylloplane - diseased leaf -<br><i>Puccinia antirrhini</i><br>MCA 6366 | California | Berkeley | 2016 Aug 05 | MG471080 | - | - | -        | -        |
| MCA6391 | <i>Sporobolomyces lactucae</i> | SDC    | Plantaginaceae;<br><i>Antirrhinum majus</i> | phylloplane - healthy flower                                            | California | Berkeley | 2016 Aug 05 | MG471082 | - | - | -        | -        |
| MCA6392 | <i>Sporobolomyces lactucae</i> | SDC    | Plantaginaceae;<br><i>Antirrhinum majus</i> | phylloplane - healthy flower                                            | California | Berkeley | 2016 Aug 05 | MG471083 | - | - | -        | -        |
| MCA6393 | <i>Sporobolomyces lactucae</i> | SDC    | Plantaginaceae;<br><i>Antirrhinum majus</i> | phylloplane - healthy flower                                            | California | Berkeley | 2016 Aug 05 | MG471084 | - | - | -        | -        |

|         |                                |     |                                             |                                                                               |            |          |                |          |   |   |   |   |
|---------|--------------------------------|-----|---------------------------------------------|-------------------------------------------------------------------------------|------------|----------|----------------|----------|---|---|---|---|
| MCA6394 | <i>Sporobolomyces lactucae</i> | SDC | Plantaginaceae;<br><i>Antirrhinum majus</i> | phylloplane<br>- healthy<br>flower                                            | California | Berkeley | 2016 Aug<br>05 | MG471085 | - | - | - | - |
| MCA6395 | <i>Sporobolomyces lactucae</i> | SDC | Liliaceae                                   | phylloplane<br>- necrotic<br>leaf                                             | California | Berkeley | 2016 Aug<br>05 | MG471086 | - | - | - | - |
| MCA6396 | <i>Sporobolomyces lactucae</i> | SDC | Liliaceae                                   | phylloplane<br>- necrotic<br>leaf                                             | California | Berkeley | 2016 Aug<br>05 | MG471087 | - | - | - | - |
| MCA6397 | <i>Sporobolomyces lactucae</i> | SDC | Plantaginaceae;<br><i>Antirrhinum majus</i> | phylloplane<br>- diseased<br>leaf -<br><i>Puccinia antirrhini</i><br>MCA 6366 | California | Berkeley | 2016 Aug<br>05 | MG471088 | - | - | - | - |
| MCA6398 | <i>Sporobolomyces lactucae</i> | SDC | Plantaginaceae;<br><i>Antirrhinum majus</i> | phylloplane<br>- necrotic<br>leaf                                             | California | Berkeley | 2016 Aug<br>05 | MG471089 | - | - | - | - |
| MCA6399 | <i>Sporobolomyces lactucae</i> | SDC | Plantaginaceae;<br><i>Antirrhinum majus</i> | phylloplane<br>- diseased<br>leaf -<br><i>Puccinia antirrhini</i><br>MCA 6366 | California | Berkeley | 2016 Aug<br>05 | MG471090 | - | - | - | - |
| MCA6400 | <i>Sporobolomyces lactucae</i> | SDC | -                                           | phylloplane                                                                   | California | Berkeley | 2016 Aug<br>05 | OK624451 | - | - | - | - |
| MCA6401 | <i>Sporobolomyces lactucae</i> | SDC | Plantaginaceae;<br><i>Antirrhinum majus</i> | phylloplane<br>- necrotic<br>leaf                                             | California | Berkeley | 2016 Aug<br>05 | MG471091 | - | - | - | - |
| MCA6402 | <i>Sporobolomyces lactucae</i> | SDC | Plantaginaceae;<br><i>Antirrhinum majus</i> | phylloplane<br>- healthy<br>flower                                            | California | Berkeley | 2016 Aug<br>05 | MG471092 | - | - | - | - |
| MCA8251 | <i>Sporobolomyces lactucae</i> | SDC | -                                           | phylloplane                                                                   | California | Berkeley | 2019 Mar       | OK623656 | - | - | - | - |
| MCA8252 | <i>Sporobolomyces lactucae</i> | SDC | -                                           | phylloplane                                                                   | California | Berkeley | 2019 Mar       | OK623652 | - | - | - | - |
| MCA8256 | <i>Sporobolomyces</i>          | SDC | -                                           | phylloplane                                                                   | California | Berkeley | 2019 Mar       | OK623653 | - | - | - | - |

*lactucae*

|         |                       |     |   |             |            |          |          |          |   |   |   |   |
|---------|-----------------------|-----|---|-------------|------------|----------|----------|----------|---|---|---|---|
| MCA8258 | <i>Sporobolomyces</i> | SDC | - | phylloplane | California | Berkeley | 2019 Mar | MZ686261 | - | - | - | - |
|---------|-----------------------|-----|---|-------------|------------|----------|----------|----------|---|---|---|---|

*lactucae*

|         |                       |     |   |             |            |          |          |          |   |   |   |   |
|---------|-----------------------|-----|---|-------------|------------|----------|----------|----------|---|---|---|---|
| MCA8260 | <i>Sporobolomyces</i> | SDC | - | phylloplane | California | Berkeley | 2019 Mar | OK586496 | - | - | - | - |
|---------|-----------------------|-----|---|-------------|------------|----------|----------|----------|---|---|---|---|

*lactucae*

|         |                       |     |   |             |            |          |          |          |   |   |   |   |
|---------|-----------------------|-----|---|-------------|------------|----------|----------|----------|---|---|---|---|
| MCA8261 | <i>Sporobolomyces</i> | SDC | - | phylloplane | California | Berkeley | 2019 Mar | OK623658 | - | - | - | - |
|---------|-----------------------|-----|---|-------------|------------|----------|----------|----------|---|---|---|---|

*lactucae*

|         |                       |     |   |             |            |          |          |          |   |   |   |   |
|---------|-----------------------|-----|---|-------------|------------|----------|----------|----------|---|---|---|---|
| MCA8283 | <i>Sporobolomyces</i> | SDC | - | phylloplane | California | Berkeley | 2019 Mar | OK623657 | - | - | - | - |
|---------|-----------------------|-----|---|-------------|------------|----------|----------|----------|---|---|---|---|

*lactucae*

|         |                       |     |   |             |            |          |          |          |   |   |   |   |
|---------|-----------------------|-----|---|-------------|------------|----------|----------|----------|---|---|---|---|
| MCA8284 | <i>Sporobolomyces</i> | SDC | - | phylloplane | California | Berkeley | 2019 Mar | OK586497 | - | - | - | - |
|---------|-----------------------|-----|---|-------------|------------|----------|----------|----------|---|---|---|---|

*lactucae*

|         |                       |     |   |             |            |          |          |          |   |   |   |   |
|---------|-----------------------|-----|---|-------------|------------|----------|----------|----------|---|---|---|---|
| MCA8285 | <i>Sporobolomyces</i> | SDC | - | phylloplane | California | Berkeley | 2019 Mar | OK586495 | - | - | - | - |
|---------|-----------------------|-----|---|-------------|------------|----------|----------|----------|---|---|---|---|

*lactucae*
