# Supplementary material for: Sporobolomyces lactucae sp. nov. (Pucciniomycotina, Microbotryomycetes, Sporidiobolales): An Abundant Component of Romaine Lettuce Phylloplanes
Source: J Fungi (Basel). 2022 Mar 16;8(3):302. doi: 10.3390/jof8030302 (PMC8951336; doi:10.3390/jof8030302)
Supplement: Supplementary file 1 [file jof-08-00302-s001.zip]

Archive with 4 entries (4 files):
- jof-1595102-Supplementary Figures.pdf
- jof-1595102-Supplementary Table S1.pdf
- jof-1595102-Supplementary Table S2.pdf
- jof-1595102-Supplementary Table S3.pdf
